# Supplementary material
Source: PubMed Central journal article supplement (PMC1847665)

# A

RyR1 (1313-1347) SPGLQPPAEDEARAAEPD TDYENLRRSAGGWGEAE  
 \* \* \* \* \* \* \* \* \* \* \* \* \* \* \* \* \* \*  
 RyR2 (1326-1357) --GFYGP KSD-LED FVDSD FEVLMKTAHGHLVPD  
 RyR1 (1348-1382) GGKDGTAK EGTPGGTAQAGVEAQPARAENEKDSTT  
 \* \* \* \* \* \* \* \* \* \* \* \* \* \* \* \* \* \*  
 RyR2 (1358-1382) RIDKD--KETPKPEFNNHKDYAQ-----EKPS--  
 RyR1 (1383-1417) EKNKRGFLFKAKKVAMMTQPPSTPALPRLPRDVV  
 \* \* \* \* \* \* \* \* \* \* \* \* \* \* \* \* \* \*  
 RyR2 (1383-1409) --RLKQRFLLRRTK-----PDYSTGH SARLTED-V

# B

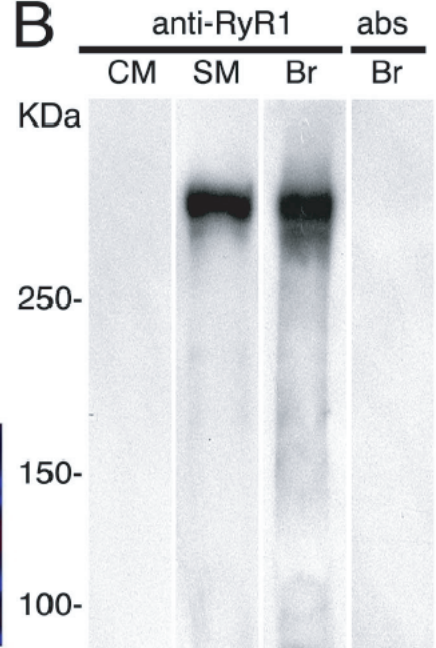

# C

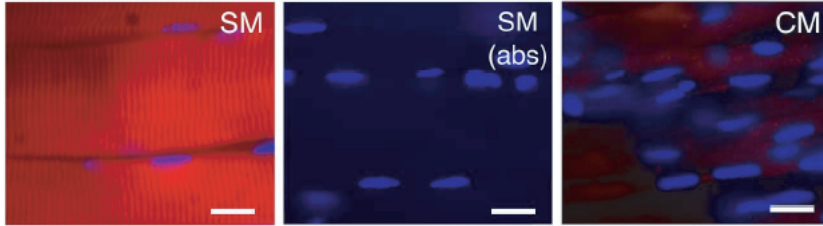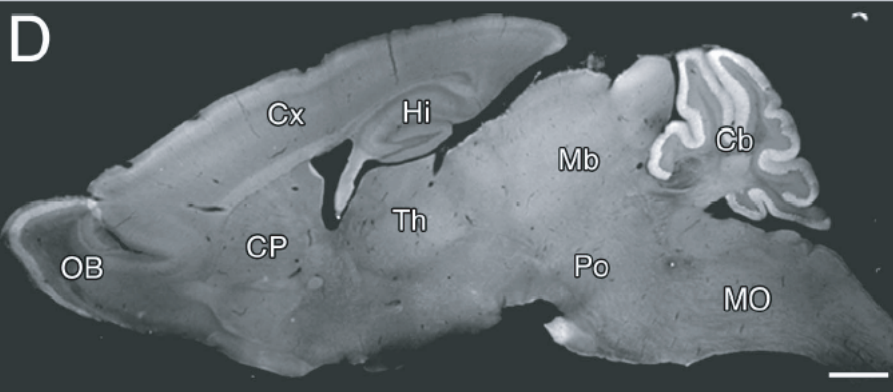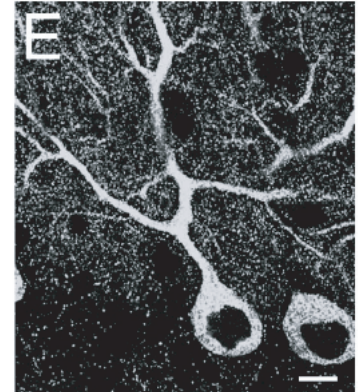

Supplement: 7601639s5.pdf [file 7601639s5.pdf]
