# Supplementary material
Source: PubMed Central journal article supplement (PMC1847665)
Supplement: 7601639s8.pdf [file 7601639s8.pdf]

**Supplementary Table I.** Kinetics of CF-EPSCs and PF-EPSCs in JP-DKO PCs

|         |                    | 10 - 90% rise<br>time (ms) | Decay Time<br>constant (ms) | Amplitude<br>(nA) | Conductance<br>(hp:-10 to +50 mV) (nS) |
|---------|--------------------|----------------------------|-----------------------------|-------------------|----------------------------------------|
| CF-EPSC | Wild-type (n = 16) | 0.37 ± 0.06                | 5.0 ± 1.1                   | 2.3 ± 0.8         | 88 ± 36                                |
|         | JP-DKO (n = 19)    | 0.36 ± 0.04                | 5.9 ± 1.1*                  | 2.3 ± 0.8         | 95 ± 46                                |
| PF-EPSC | Wild-type (n = 11) | 1.0 ± 0.3                  | 9.0 ± 3.1                   |                   |                                        |
|         | JP-DKO (n = 11)    | 0.9 ± 0.1                  | 8.5 ± 2.2                   |                   |                                        |

The data represent mean ± SD., and a significant difference between the genotypes is indicated by an asterisk (\*p < 0.05).

Data are obtained from 5 to 9-week-old mice.
