# Supplementary material
Source: PubMed Central journal article supplement (PMC1847665)

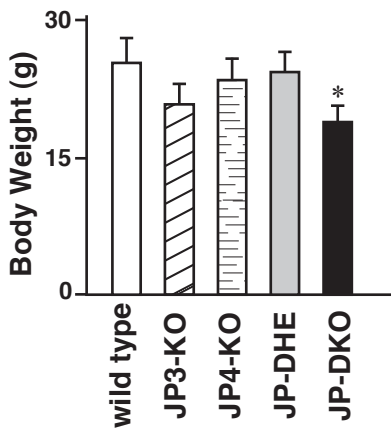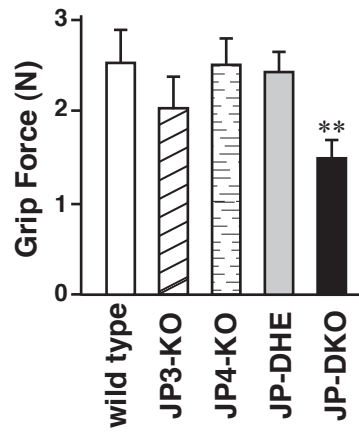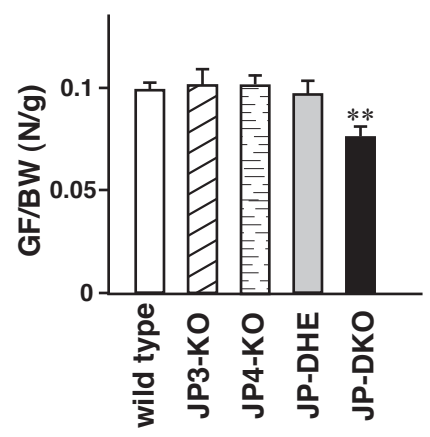

Supplement: 7601639s1.pdf [file 7601639s1.pdf]

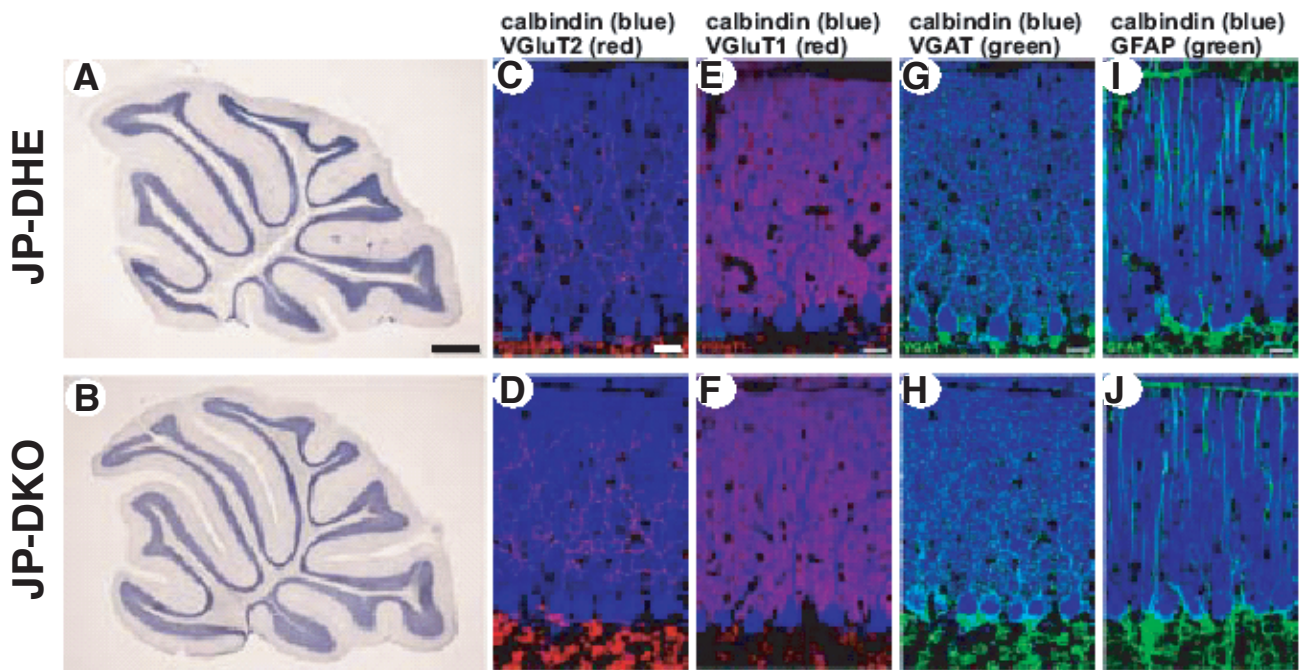

Supplementary Figure 2 (Kakizawa et al.)

Supplement: 7601639s2.pdf [file 7601639s2.pdf]

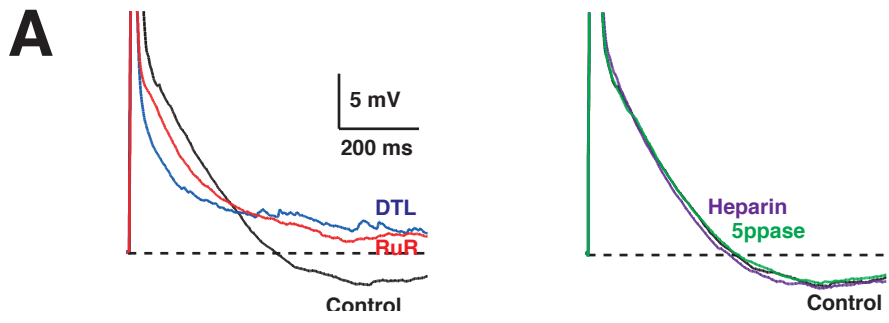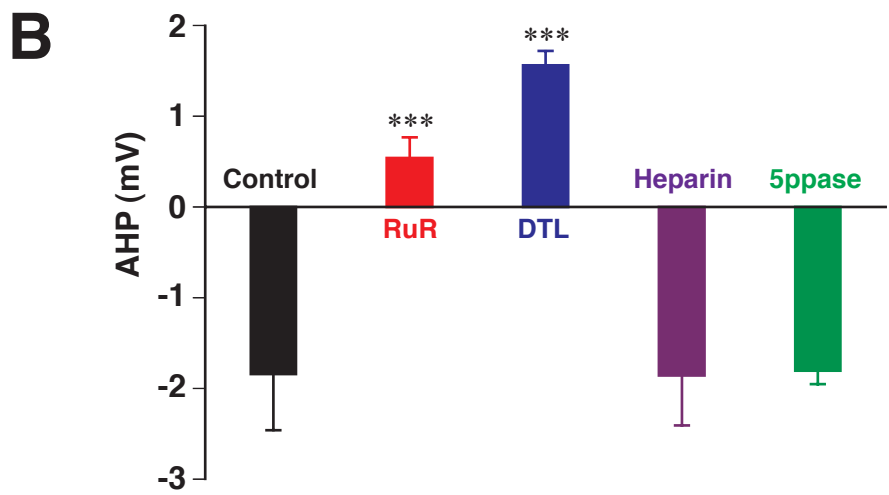

Supplement: 7601639s3.pdf [file 7601639s3.pdf]

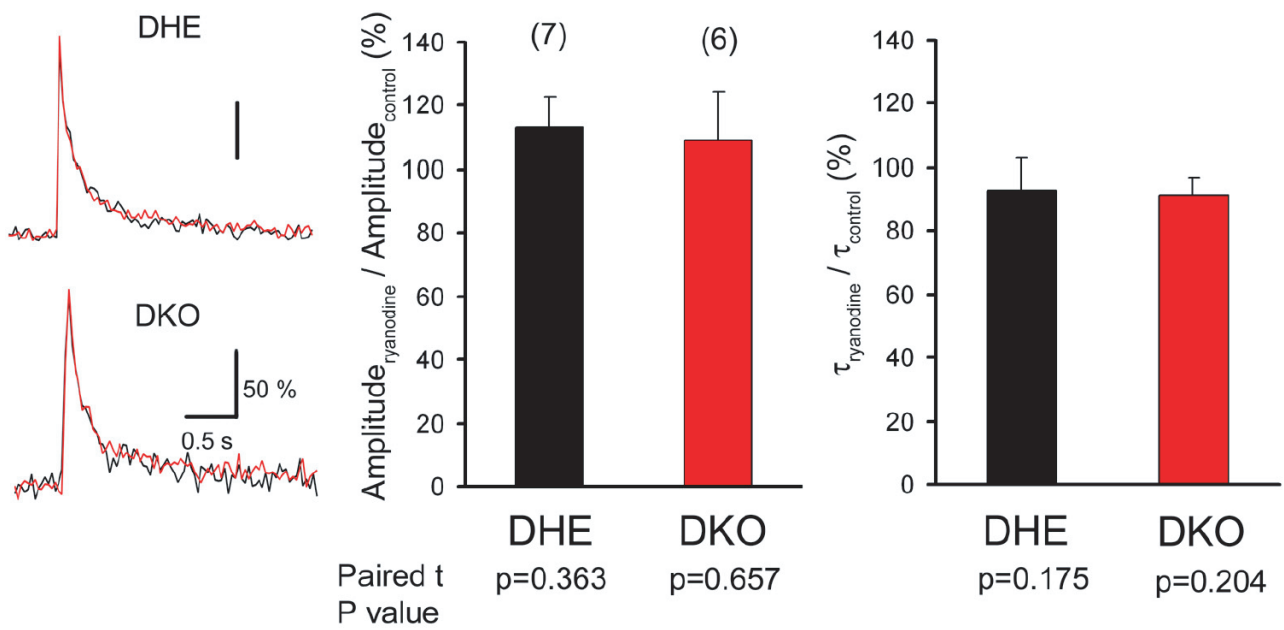

|            | $\Delta F/F_0$     | Decay time constant (s) | n        |
|------------|--------------------|-------------------------|----------|
| <b>DHE</b> | <b>1.00 ± 0.66</b> | <b>0.17 ± 0.06</b>      | <b>7</b> |
| <b>DKO</b> | <b>0.97 ± 0.57</b> | <b>0.18 ± 0.05</b>      | <b>7</b> |

Supplementary Figure 4 (Kakizawa et al.)

Supplement: 7601639s4.pdf [file 7601639s4.pdf]

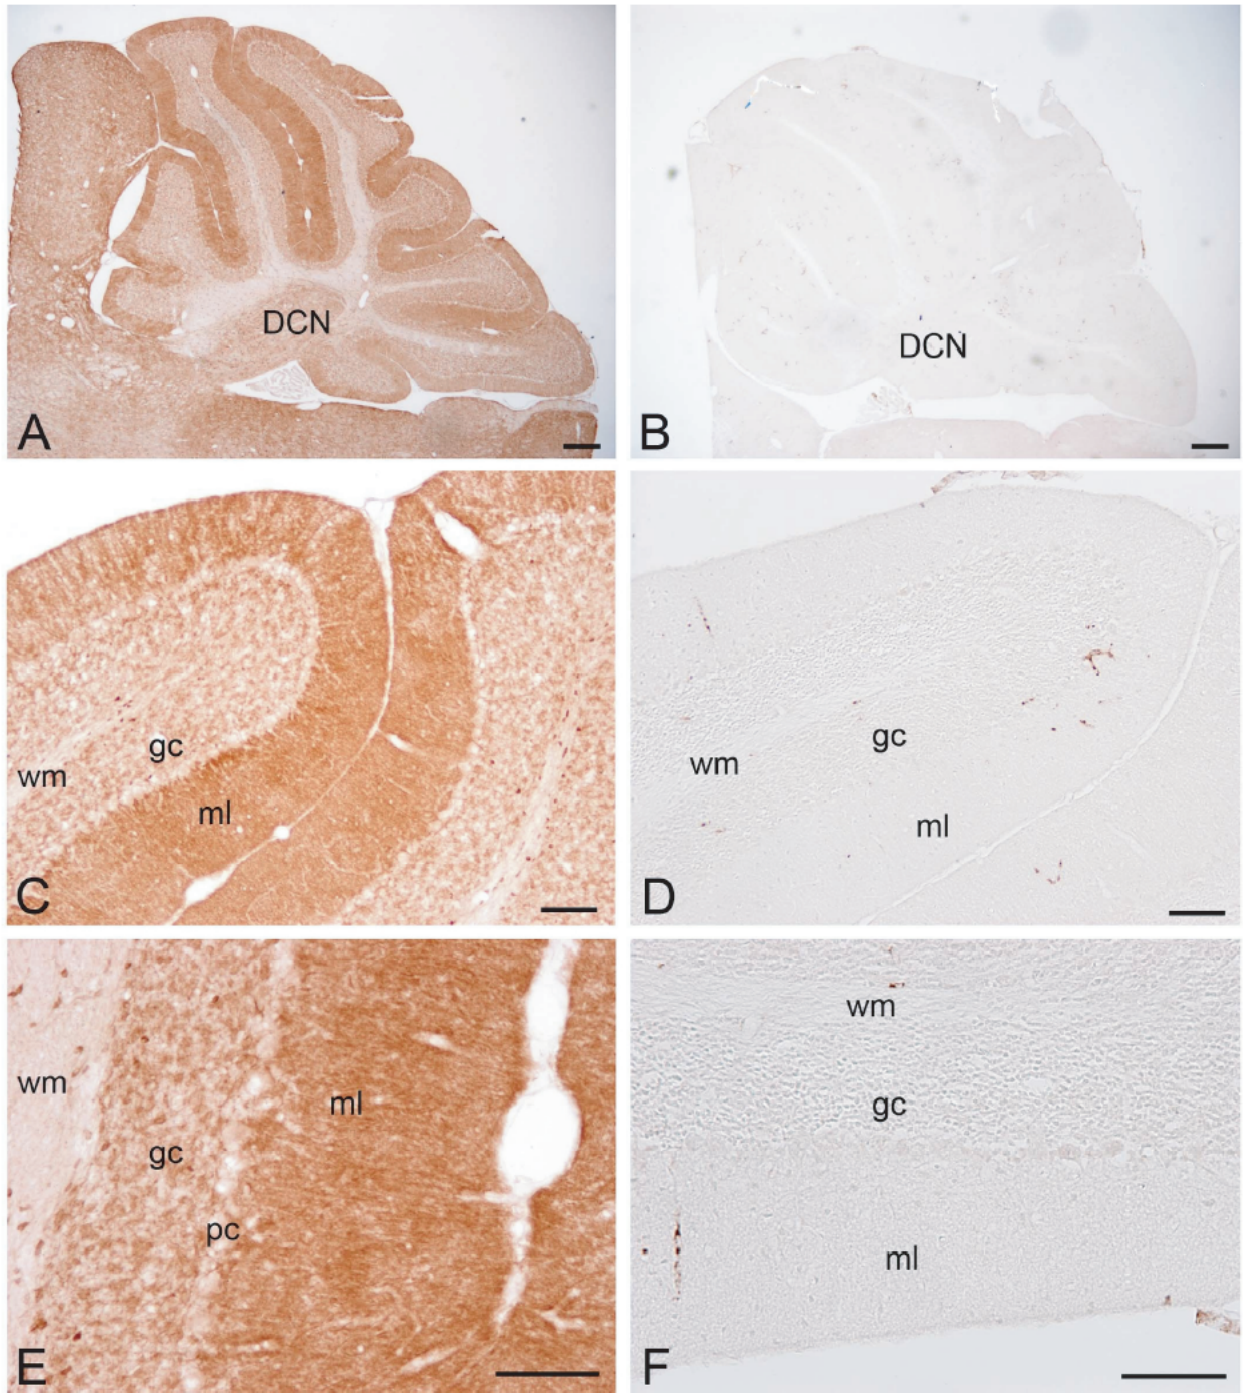

Supplementary Figure 6 (Kakizawa et al.)

Supplement: 7601639s6.pdf [file 7601639s6.pdf]

## JP4-DsRed

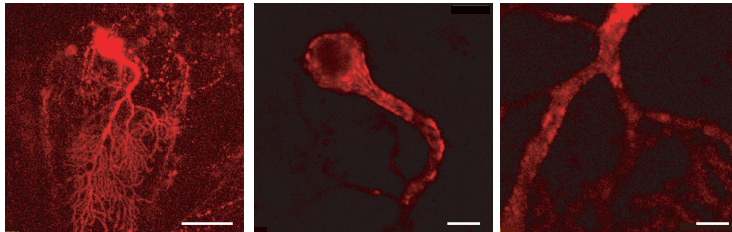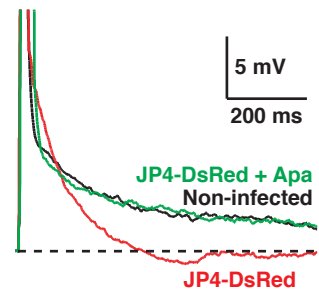

## DsRed-JP4

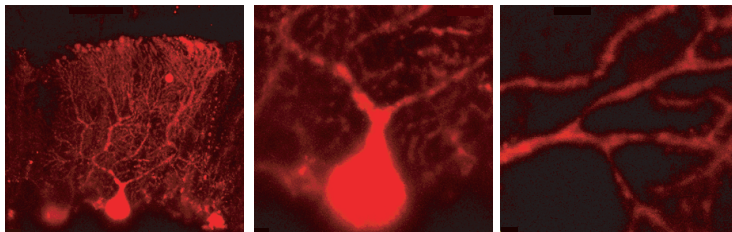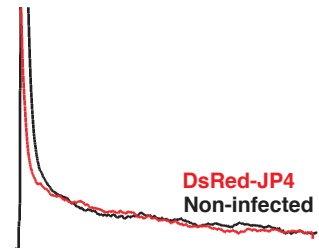

Supplement: 7601639s7.pdf [file 7601639s7.pdf]
